# Supplementary material for: A unified strategy for the synthesis of highly oxygenated diaryl ethers featured in ellagitannins
Source: Springer Nature journal article supplement (doi:10.1038/ncomms4478), 2014-03-24
Supplement: 41467_2014_BFncomms4478_MOESM33_ESM.mol [file 41467_2014_BFncomms4478_MOESM33_ESM.mol]

  ChemDraw03101407342D

 71 77  0  0  0  0  0  0  0  0999 V2000
   -3.2671   -1.0711    0.0000 C   0  0  0  0  0  0  0  0  0  0  0  0
   -3.6796   -0.3578    0.0000 C   0  0  0  0  0  0  0  0  0  0  0  0
   -3.2694    0.3578    0.0000 C   0  0  0  0  0  0  0  0  0  0  0  0
   -2.4421    0.3578    0.0000 C   0  0  0  0  0  0  0  0  0  0  0  0
   -2.0296   -0.3578    0.0000 C   0  0  0  0  0  0  0  0  0  0  0  0
   -1.2097   -0.3578    0.0000 C   0  0  0  0  0  0  0  0  0  0  0  0
   -0.7972    0.3578    0.0000 C   0  0  0  0  0  0  0  0  0  0  0  0
    0.0278    0.3578    0.0000 C   0  0  0  0  0  0  0  0  0  0  0  0
    0.4403   -0.3578    0.0000 C   0  0  0  0  0  0  0  0  0  0  0  0
    0.0278   -1.0711    0.0000 C   0  0  0  0  0  0  0  0  0  0  0  0
   -1.9837    1.0688    0.0000 O   0  0  0  0  0  0  0  0  0  0  0  0
   -3.6796    1.0688    0.0000 O   0  0  0  0  0  0  0  0  0  0  0  0
   -4.5023   -0.3578    0.0000 O   0  0  0  0  0  0  0  0  0  0  0  0
   -1.2555    1.0688    0.0000 O   0  0  0  0  0  0  0  0  0  0  0  0
    0.4380    1.0688    0.0000 O   0  0  0  0  0  0  0  0  0  0  0  0
    1.2630   -0.3578    0.0000 O   0  0  0  0  0  0  0  0  0  0  0  0
    1.1536    1.4813    0.0000 C   0  0  0  0  0  0  0  0  0  0  0  0
    1.1536    2.3063    0.0000 C   0  0  0  0  0  0  0  0  0  0  0  0
    1.8674    2.7188    0.0000 C   0  0  0  0  0  0  0  0  0  0  0  0
    2.5830    2.3063    0.0000 C   0  0  0  0  0  0  0  0  0  0  0  0
    2.5830    1.4813    0.0000 C   0  0  0  0  0  0  0  0  0  0  0  0
    1.8674    1.0688    0.0000 C   0  0  0  0  0  0  0  0  0  0  0  0
    0.4403    2.7188    0.0000 C   0  0  0  0  0  0  0  0  0  0  0  0
    1.8674    0.2438    0.0000 O   0  0  0  0  0  0  0  0  0  0  0  0
    3.2963    2.7188    0.0000 O   0  0  0  0  0  0  0  0  0  0  0  0
    3.2963    1.0688    0.0000 O   0  0  0  0  0  0  0  0  0  0  0  0
   -1.0229   -1.5225    0.0000 C   0  0  0  0  0  0  0  0  0  0  0  0
   -1.7339   -1.5225    0.0000 O   0  0  0  0  0  0  0  0  0  0  0  0
   -2.0685   -1.9373    0.0000 C   0  0  0  0  0  0  0  0  0  0  0  0
   -1.2435   -1.9373    0.0000 O   0  0  0  0  0  0  0  0  0  0  0  0
   -0.7972   -1.0711    0.0000 C   0  0  0  0  0  0  0  0  0  0  0  0
   -2.4421   -1.0711    0.0000 C   0  0  0  0  0  0  0  0  0  0  0  0
   -2.4953   -2.6220    0.0000 O   0  0  0  0  0  0  0  0  0  0  0  0
   -0.7439   -2.6220    0.0000 O   0  0  0  0  0  0  0  0  0  0  0  0
   -0.7439   -3.4470    0.0000 C   0  0  0  0  0  0  0  0  0  0  0  0
   -2.4953   -3.4470    0.0000 C   0  0  0  0  0  0  0  0  0  0  0  0
   -1.6148   -3.9563    0.0000 C   0  0  0  0  0  0  0  0  0  0  0  0
    1.6755   -1.0711    0.0000 C   0  0  0  0  0  0  0  0  0  0  0  0
    2.5005   -1.0711    0.0000 O   0  0  0  0  0  0  0  0  0  0  0  0
   -4.9148   -1.0711    0.0000 C   0  0  0  0  0  0  0  0  0  0  0  0
   -5.7398   -1.0711    0.0000 O   0  0  0  0  0  0  0  0  0  0  0  0
   -2.5681    1.6537    0.0000 C   0  0  0  0  0  0  0  0  0  0  0  0
   -0.7027    1.6801    0.0000 C   0  0  0  0  0  0  0  0  0  0  0  0
   -0.9548    2.4810    0.0000 O   0  0  0  0  0  0  0  0  0  0  0  0
   -2.5681    2.4787    0.0000 O   0  0  0  0  0  0  0  0  0  0  0  0
    0.4403    3.5438    0.0000 O   0  0  0  0  0  0  0  0  0  0  0  0
   -4.5046    1.0688    0.0000 C   0  0  0  0  0  0  0  0  0  0  0  0
   -4.9171    1.7843    0.0000 C   0  0  0  0  0  0  0  0  0  0  0  0
    4.0124    2.3063    0.0000 C   0  0  0  0  0  0  0  0  0  0  0  0
    4.7257    2.7188    0.0000 C   0  0  0  0  0  0  0  0  0  0  0  0
    4.0124    1.4813    0.0000 C   0  0  0  0  0  0  0  0  0  0  0  0
    4.7257    1.0688    0.0000 C   0  0  0  0  0  0  0  0  0  0  0  0
   -4.5046    2.4982    0.0000 C   0  0  0  0  0  0  0  0  0  0  0  0
   -4.9171    3.2138    0.0000 C   0  0  0  0  0  0  0  0  0  0  0  0
   -5.7421    3.2138    0.0000 C   0  0  0  0  0  0  0  0  0  0  0  0
   -6.1546    2.4982    0.0000 C   0  0  0  0  0  0  0  0  0  0  0  0
   -5.7421    1.7843    0.0000 C   0  0  0  0  0  0  0  0  0  0  0  0
    5.4413    2.3063    0.0000 C   0  0  0  0  0  0  0  0  0  0  0  0
    6.1546    2.7188    0.0000 C   0  0  0  0  0  0  0  0  0  0  0  0
    6.1546    3.5438    0.0000 C   0  0  0  0  0  0  0  0  0  0  0  0
    5.4413    3.9563    0.0000 C   0  0  0  0  0  0  0  0  0  0  0  0
    4.7257    3.5438    0.0000 C   0  0  0  0  0  0  0  0  0  0  0  0
    4.7257    0.2438    0.0000 C   0  0  0  0  0  0  0  0  0  0  0  0
    5.4413   -0.1687    0.0000 C   0  0  0  0  0  0  0  0  0  0  0  0
    6.1546    0.2438    0.0000 C   0  0  0  0  0  0  0  0  0  0  0  0
    6.1546    1.0688    0.0000 C   0  0  0  0  0  0  0  0  0  0  0  0
    5.4413    1.4813    0.0000 C   0  0  0  0  0  0  0  0  0  0  0  0
   -6.1508   -0.3591    0.0000 C   0  0  0  0  0  0  0  0  0  0  0  0
    2.9116   -0.3591    0.0000 C   0  0  0  0  0  0  0  0  0  0  0  0
   -0.3990    3.0869    0.0000 C   0  0  0  0  0  0  0  0  0  0  0  0
   -3.2801    2.8898    0.0000 C   0  0  0  0  0  0  0  0  0  0  0  0
  1  2  2  0      
  2  3  1  0      
  3  4  2  0      
  4  5  1  0      
  5 32  2  0      
 32  1  1  0      
  5  6  1  0      
  6  7  2  0      
  7  8  1  0      
  8  9  2  0      
  9 10  1  0      
 10 31  2  0      
 31  6  1  0      
  4 11  1  0      
  3 12  1  0      
  2 13  1  0      
  7 14  1  0      
  8 15  1  0      
  9 16  1  0      
 15 17  1  0      
 17 18  2  0      
 18 19  1  0      
 19 20  2  0      
 20 21  1  0      
 21 22  2  0      
 22 17  1  0      
 18 23  1  0      
 22 24  1  0      
 20 25  1  0      
 21 26  1  0      
 27 28  2  0      
 29 30  2  0      
 32 29  1  0      
 31 27  1  0      
 33 36  1  0      
 35 34  1  0      
 33 29  1  0      
 34 27  1  0      
 36 37  1  0      
 35 37  1  0      
 16 38  1  0      
 38 39  1  0      
 13 40  1  0      
 40 41  1  0      
 11 42  1  0      
 14 43  1  0      
 43 44  1  0      
 42 45  1  0      
 23 46  2  0      
 12 47  1  0      
 47 48  1  0      
 25 49  1  0      
 49 50  1  0      
 26 51  1  0      
 51 52  1  0      
 48 53  2  0      
 53 54  1  0      
 54 55  2  0      
 55 56  1  0      
 56 57  2  0      
 57 48  1  0      
 50 58  2  0      
 58 59  1  0      
 59 60  2  0      
 60 61  1  0      
 61 62  2  0      
 62 50  1  0      
 52 63  2  0      
 63 64  1  0      
 64 65  2  0      
 65 66  1  0      
 66 67  2  0      
 67 52  1  0      
 41 68  1  0      
 39 69  1  0      
 44 70  1  0      
 45 71  1  0      
M  END
