# Supplementary material for: A unified strategy for the synthesis of highly oxygenated diaryl ethers featured in ellagitannins
Source: Springer Nature journal article supplement (doi:10.1038/ncomms4478), 2014-03-24
Supplement: 41467_2014_BFncomms4478_MOESM39_ESM.mol [file 41467_2014_BFncomms4478_MOESM39_ESM.mol]

  ChemDraw03101407342D

164183  0  0  0  0  0  0  0  0999 V2000
   -0.7342    0.3982    0.0000 C   0  0  0  0  0  0  0  0  0  0  0  0
   -0.7342   -0.4268    0.0000 C   0  0  0  0  0  0  0  0  0  0  0  0
   -0.0198   -0.8393    0.0000 C   0  0  0  0  0  0  0  0  0  0  0  0
    0.6947   -0.4268    0.0000 C   0  0  0  0  0  0  0  0  0  0  0  0
    0.6947    0.3982    0.0000 O   0  0  0  0  0  0  0  0  0  0  0  0
   -0.0198    0.8107    0.0000 C   0  0  0  0  0  0  0  0  0  0  0  0
   -0.0198    1.6328    0.0000 C   0  0  0  0  0  0  0  0  0  0  0  0
   -0.7318    2.0439    0.0000 O   0  0  0  0  0  0  0  0  0  0  0  0
   -1.4462    0.8092    0.0000 O   0  0  0  0  0  0  0  0  0  0  0  0
   -1.4462   -0.8379    0.0000 O   0  0  0  0  0  0  0  0  0  0  0  0
   -2.2426   -1.0516    0.0000 C   0  0  0  0  0  0  0  0  0  0  0  0
   -2.8270   -0.4667    0.0000 O   0  0  0  0  0  0  0  0  0  0  0  0
   -2.4557   -1.8474    0.0000 C   0  0  0  0  0  0  0  0  0  0  0  0
   -3.2544   -2.0611    0.0000 C   0  0  0  0  0  0  0  0  0  0  0  0
   -3.4675   -2.8569    0.0000 C   0  0  0  0  0  0  0  0  0  0  0  0
   -2.8831   -3.4418    0.0000 C   0  0  0  0  0  0  0  0  0  0  0  0
   -2.0873   -3.2281    0.0000 C   0  0  0  0  0  0  0  0  0  0  0  0
   -1.8736   -2.4295    0.0000 C   0  0  0  0  0  0  0  0  0  0  0  0
   -3.0962   -4.2376    0.0000 O   0  0  0  0  0  0  0  0  0  0  0  0
   -4.2638   -3.0706    0.0000 O   0  0  0  0  0  0  0  0  0  0  0  0
   -1.5024   -3.8102    0.0000 O   0  0  0  0  0  0  0  0  0  0  0  0
   -1.7161   -4.6088    0.0000 C   0  0  0  0  0  0  0  0  0  0  0  0
   -4.4770   -3.8686    0.0000 C   0  0  0  0  0  0  0  0  0  0  0  0
   -3.8949   -4.4536    0.0000 C   0  0  0  0  0  0  0  0  0  0  0  0
   -4.1057   -5.2494    0.0000 C   0  0  0  0  0  0  0  0  0  0  0  0
   -5.2756   -4.0823    0.0000 C   0  0  0  0  0  0  0  0  0  0  0  0
   -1.3036   -5.3221    0.0000 C   0  0  0  0  0  0  0  0  0  0  0  0
   -5.8577   -3.4974    0.0000 C   0  0  0  0  0  0  0  0  0  0  0  0
   -6.6535   -3.7134    0.0000 C   0  0  0  0  0  0  0  0  0  0  0  0
   -6.8672   -4.5092    0.0000 C   0  0  0  0  0  0  0  0  0  0  0  0
   -6.2851   -5.0918    0.0000 C   0  0  0  0  0  0  0  0  0  0  0  0
   -5.4887   -4.8781    0.0000 C   0  0  0  0  0  0  0  0  0  0  0  0
   -4.9044   -5.4631    0.0000 C   0  0  0  0  0  0  0  0  0  0  0  0
   -5.1175   -6.2588    0.0000 C   0  0  0  0  0  0  0  0  0  0  0  0
   -4.5354   -6.8432    0.0000 C   0  0  0  0  0  0  0  0  0  0  0  0
   -3.7373   -6.6301    0.0000 C   0  0  0  0  0  0  0  0  0  0  0  0
   -3.5236   -5.8314    0.0000 C   0  0  0  0  0  0  0  0  0  0  0  0
   -1.7161   -6.0377    0.0000 C   0  0  0  0  0  0  0  0  0  0  0  0
   -1.3036   -6.7516    0.0000 C   0  0  0  0  0  0  0  0  0  0  0  0
   -0.4786   -6.7516    0.0000 C   0  0  0  0  0  0  0  0  0  0  0  0
   -0.0661   -6.0377    0.0000 C   0  0  0  0  0  0  0  0  0  0  0  0
   -0.4786   -5.3221    0.0000 C   0  0  0  0  0  0  0  0  0  0  0  0
   -0.0198   -1.6615    0.0000 O   0  0  0  0  0  0  0  0  0  0  0  0
   -0.2335   -2.4601    0.0000 C   0  0  0  0  0  0  0  0  0  0  0  0
    0.3515   -3.0422    0.0000 C   0  0  0  0  0  0  0  0  0  0  0  0
   -1.0292   -2.6732    0.0000 O   0  0  0  0  0  0  0  0  0  0  0  0
    0.1378   -3.8408    0.0000 C   0  0  0  0  0  0  0  0  0  0  0  0
    0.7204   -4.4229    0.0000 C   0  0  0  0  0  0  0  0  0  0  0  0
    1.5162   -4.2092    0.0000 C   0  0  0  0  0  0  0  0  0  0  0  0
    1.7299   -3.4135    0.0000 C   0  0  0  0  0  0  0  0  0  0  0  0
    1.1473   -2.8285    0.0000 C   0  0  0  0  0  0  0  0  0  0  0  0
    2.1012   -4.7919    0.0000 O   0  0  0  0  0  0  0  0  0  0  0  0
    0.5067   -5.2187    0.0000 O   0  0  0  0  0  0  0  0  0  0  0  0
    2.5280   -3.1998    0.0000 O   0  0  0  0  0  0  0  0  0  0  0  0
    1.0917   -5.8037    0.0000 C   0  0  0  0  0  0  0  0  0  0  0  0
    0.8757   -6.5994    0.0000 C   0  0  0  0  0  0  0  0  0  0  0  0
    1.8875   -5.5900    0.0000 C   0  0  0  0  0  0  0  0  0  0  0  0
    2.4696   -6.1726    0.0000 C   0  0  0  0  0  0  0  0  0  0  0  0
    3.1107   -3.7824    0.0000 C   0  0  0  0  0  0  0  0  0  0  0  0
    3.9087   -3.5687    0.0000 C   0  0  0  0  0  0  0  0  0  0  0  0
    4.4908   -4.1514    0.0000 C   0  0  0  0  0  0  0  0  0  0  0  0
    5.2895   -3.9400    0.0000 C   0  0  0  0  0  0  0  0  0  0  0  0
    5.5003   -3.1419    0.0000 C   0  0  0  0  0  0  0  0  0  0  0  0
    4.9182   -2.5592    0.0000 C   0  0  0  0  0  0  0  0  0  0  0  0
    4.1224   -2.7729    0.0000 C   0  0  0  0  0  0  0  0  0  0  0  0
    2.2564   -6.9707    0.0000 C   0  0  0  0  0  0  0  0  0  0  0  0
    2.8408   -7.5534    0.0000 C   0  0  0  0  0  0  0  0  0  0  0  0
    3.6372   -7.3397    0.0000 C   0  0  0  0  0  0  0  0  0  0  0  0
    3.8503   -6.5439    0.0000 C   0  0  0  0  0  0  0  0  0  0  0  0
    3.2682   -5.9589    0.0000 C   0  0  0  0  0  0  0  0  0  0  0  0
    0.0799   -6.8131    0.0000 C   0  0  0  0  0  0  0  0  0  0  0  0
   -0.1338   -7.6112    0.0000 C   0  0  0  0  0  0  0  0  0  0  0  0
    0.4483   -8.1939    0.0000 C   0  0  0  0  0  0  0  0  0  0  0  0
    1.2470   -7.9802    0.0000 C   0  0  0  0  0  0  0  0  0  0  0  0
    1.4607   -7.1844    0.0000 C   0  0  0  0  0  0  0  0  0  0  0  0
    1.4067   -0.8379    0.0000 O   0  0  0  0  0  0  0  0  0  0  0  0
    2.1223   -1.2504    0.0000 C   0  0  0  0  0  0  0  0  0  0  0  0
    2.1223   -2.0754    0.0000 O   0  0  0  0  0  0  0  0  0  0  0  0
    2.8361   -0.8379    0.0000 C   0  0  0  0  0  0  0  0  0  0  0  0
    3.5517   -1.2504    0.0000 C   0  0  0  0  0  0  0  0  0  0  0  0
    4.2650   -0.8379    0.0000 C   0  0  0  0  0  0  0  0  0  0  0  0
    4.2650   -0.0129    0.0000 C   0  0  0  0  0  0  0  0  0  0  0  0
    3.5517    0.3996    0.0000 C   0  0  0  0  0  0  0  0  0  0  0  0
    2.8361   -0.0129    0.0000 C   0  0  0  0  0  0  0  0  0  0  0  0
    4.9811    0.3996    0.0000 O   0  0  0  0  0  0  0  0  0  0  0  0
    3.5517    1.2246    0.0000 O   0  0  0  0  0  0  0  0  0  0  0  0
    4.9811   -1.2504    0.0000 O   0  0  0  0  0  0  0  0  0  0  0  0
    4.2650    1.6371    0.0000 C   0  0  0  0  0  0  0  0  0  0  0  0
    4.2650    2.4621    0.0000 C   0  0  0  0  0  0  0  0  0  0  0  0
    5.6944   -0.0129    0.0000 C   0  0  0  0  0  0  0  0  0  0  0  0
    6.4077    0.3996    0.0000 C   0  0  0  0  0  0  0  0  0  0  0  0
    5.6944   -0.8379    0.0000 C   0  0  0  0  0  0  0  0  0  0  0  0
    6.4077   -1.2504    0.0000 C   0  0  0  0  0  0  0  0  0  0  0  0
    6.4077   -2.0754    0.0000 C   0  0  0  0  0  0  0  0  0  0  0  0
    7.1233   -2.4879    0.0000 C   0  0  0  0  0  0  0  0  0  0  0  0
    7.8371   -2.0754    0.0000 C   0  0  0  0  0  0  0  0  0  0  0  0
    7.8371   -1.2504    0.0000 C   0  0  0  0  0  0  0  0  0  0  0  0
    7.1233   -0.8379    0.0000 C   0  0  0  0  0  0  0  0  0  0  0  0
    7.1233   -0.0129    0.0000 C   0  0  0  0  0  0  0  0  0  0  0  0
    7.8371    0.3996    0.0000 C   0  0  0  0  0  0  0  0  0  0  0  0
    7.8371    1.2246    0.0000 C   0  0  0  0  0  0  0  0  0  0  0  0
    7.1233    1.6371    0.0000 C   0  0  0  0  0  0  0  0  0  0  0  0
    6.4077    1.2246    0.0000 C   0  0  0  0  0  0  0  0  0  0  0  0
    4.9811    2.8746    0.0000 C   0  0  0  0  0  0  0  0  0  0  0  0
    4.9811    3.6996    0.0000 C   0  0  0  0  0  0  0  0  0  0  0  0
    4.2650    4.1121    0.0000 C   0  0  0  0  0  0  0  0  0  0  0  0
    3.5517    3.6996    0.0000 C   0  0  0  0  0  0  0  0  0  0  0  0
    3.5517    2.8746    0.0000 C   0  0  0  0  0  0  0  0  0  0  0  0
   -4.9811    3.4060    0.0000 O   0  0  0  0  0  0  0  0  0  0  0  0
   -4.9811    1.7589    0.0000 O   0  0  0  0  0  0  0  0  0  0  0  0
   -1.4141    5.4662    0.0000 O   0  0  0  0  0  0  0  0  0  0  0  0
    0.0124    4.6412    0.0000 O   0  0  0  0  0  0  0  0  0  0  0  0
   -1.9773    2.3020    0.0000 O   0  0  0  0  0  0  0  0  0  0  0  0
   -1.5018    1.9869    0.0000 O   0  0  0  0  0  0  0  0  0  0  0  0
   -2.8384    2.9964    0.0000 C   0  0  0  0  0  0  0  0  0  0  0  0
   -3.5546    3.4089    0.0000 C   0  0  0  0  0  0  0  0  0  0  0  0
   -4.2678    2.9964    0.0000 C   0  0  0  0  0  0  0  0  0  0  0  0
   -4.2678    2.1714    0.0000 C   0  0  0  0  0  0  0  0  0  0  0  0
   -3.5546    1.7589    0.0000 C   0  0  0  0  0  0  0  0  0  0  0  0
   -2.8384    2.1714    0.0000 C   0  0  0  0  0  0  0  0  0  0  0  0
   -2.0575    1.7004    0.0000 C   0  0  0  0  0  0  0  0  0  0  0  0
   -1.4164    2.5713    0.0000 C   0  0  0  0  0  0  0  0  0  0  0  0
   -2.1274    3.4060    0.0000 C   0  0  0  0  0  0  0  0  0  0  0  0
   -1.4141    2.9935    0.0000 C   0  0  0  0  0  0  0  0  0  0  0  0
   -0.6986    3.4060    0.0000 C   0  0  0  0  0  0  0  0  0  0  0  0
   -0.6986    4.2310    0.0000 C   0  0  0  0  0  0  0  0  0  0  0  0
   -1.4141    4.6435    0.0000 C   0  0  0  0  0  0  0  0  0  0  0  0
   -2.1274    4.2310    0.0000 C   0  0  0  0  0  0  0  0  0  0  0  0
   -3.5546    4.2339    0.0000 O   0  0  0  0  0  0  0  0  0  0  0  0
   -2.8413    4.6435    0.0000 O   0  0  0  0  0  0  0  0  0  0  0  0
   -1.9968    6.0489    0.0000 C   0  0  0  0  0  0  0  0  0  0  0  0
   -1.5843    6.7644    0.0000 C   0  0  0  0  0  0  0  0  0  0  0  0
   -2.6276    5.4399    0.0000 C   0  0  0  0  0  0  0  0  0  0  0  0
   -3.0401    6.1554    0.0000 C   0  0  0  0  0  0  0  0  0  0  0  0
   -4.3503    4.4470    0.0000 C   0  0  0  0  0  0  0  0  0  0  0  0
   -5.6944    2.9935    0.0000 C   0  0  0  0  0  0  0  0  0  0  0  0
   -6.4106    3.4060    0.0000 C   0  0  0  0  0  0  0  0  0  0  0  0
   -0.7593    6.7644    0.0000 C   0  0  0  0  0  0  0  0  0  0  0  0
   -0.3468    7.4777    0.0000 C   0  0  0  0  0  0  0  0  0  0  0  0
   -0.7593    8.1939    0.0000 C   0  0  0  0  0  0  0  0  0  0  0  0
   -1.5843    8.1939    0.0000 C   0  0  0  0  0  0  0  0  0  0  0  0
   -1.9968    7.4777    0.0000 C   0  0  0  0  0  0  0  0  0  0  0  0
   -2.6276    6.8687    0.0000 C   0  0  0  0  0  0  0  0  0  0  0  0
   -3.0401    7.5849    0.0000 C   0  0  0  0  0  0  0  0  0  0  0  0
   -3.8651    7.5849    0.0000 C   0  0  0  0  0  0  0  0  0  0  0  0
   -4.2776    6.8687    0.0000 C   0  0  0  0  0  0  0  0  0  0  0  0
   -3.8651    6.1554    0.0000 C   0  0  0  0  0  0  0  0  0  0  0  0
   -6.4106    4.2310    0.0000 C   0  0  0  0  0  0  0  0  0  0  0  0
   -7.1238    4.6435    0.0000 C   0  0  0  0  0  0  0  0  0  0  0  0
   -7.8371    4.2310    0.0000 C   0  0  0  0  0  0  0  0  0  0  0  0
   -7.8371    3.4060    0.0000 C   0  0  0  0  0  0  0  0  0  0  0  0
   -7.1238    2.9935    0.0000 C   0  0  0  0  0  0  0  0  0  0  0  0
   -4.7628    5.1603    0.0000 C   0  0  0  0  0  0  0  0  0  0  0  0
   -4.3503    5.8764    0.0000 C   0  0  0  0  0  0  0  0  0  0  0  0
   -4.7628    6.5897    0.0000 C   0  0  0  0  0  0  0  0  0  0  0  0
   -5.5878    6.5897    0.0000 C   0  0  0  0  0  0  0  0  0  0  0  0
   -6.0003    5.8764    0.0000 C   0  0  0  0  0  0  0  0  0  0  0  0
   -5.5878    5.1603    0.0000 C   0  0  0  0  0  0  0  0  0  0  0  0
    0.0124    5.4662    0.0000 C   0  0  0  0  0  0  0  0  0  0  0  0
    0.7286    5.8787    0.0000 O   0  0  0  0  0  0  0  0  0  0  0  0
   -5.6944    2.1714    0.0000 C   0  0  0  0  0  0  0  0  0  0  0  0
   -6.4106    1.7589    0.0000 O   0  0  0  0  0  0  0  0  0  0  0  0
    1.4401    5.4669    0.0000 C   0  0  0  0  0  0  0  0  0  0  0  0
   -6.4114    0.9367    0.0000 C   0  0  0  0  0  0  0  0  0  0  0  0
  1  2  1  0      
  2  3  1  0      
  3  4  1  0      
  4  5  1  0      
  5  6  1  0      
  6  1  1  0      
  3 43  1  6      
  4 76  1  1      
  6  7  1  1      
  7  8  1  0      
  1  9  1  6      
  2 10  1  1      
 10 11  1  0      
 11 12  2  0      
 11 13  1  0      
 13 14  2  0      
 14 15  1  0      
 15 16  2  0      
 16 17  1  0      
 17 18  2  0      
 18 13  1  0      
 16 19  1  0      
 15 20  1  0      
 17 21  1  0      
 21 22  1  0      
 20 23  1  0      
 19 24  1  0      
 24 25  1  0      
 23 26  1  0      
 22 27  1  0      
 26 28  2  0      
 28 29  1  0      
 29 30  2  0      
 30 31  1  0      
 31 32  2  0      
 32 26  1  0      
 25 33  2  0      
 33 34  1  0      
 34 35  2  0      
 35 36  1  0      
 36 37  2  0      
 37 25  1  0      
 27 38  2  0      
 38 39  1  0      
 39 40  2  0      
 40 41  1  0      
 41 42  2  0      
 42 27  1  0      
 43 44  1  0      
 44 45  1  0      
 44 46  2  0      
 45 47  2  0      
 47 48  1  0      
 48 49  2  0      
 49 50  1  0      
 50 51  2  0      
 51 45  1  0      
 49 52  1  0      
 48 53  1  0      
 50 54  1  0      
 53 55  1  0      
 55 56  1  0      
 52 57  1  0      
 57 58  1  0      
 54 59  1  0      
 59 60  1  0      
 60 61  2  0      
 61 62  1  0      
 62 63  2  0      
 63 64  1  0      
 64 65  2  0      
 65 60  1  0      
 58 66  2  0      
 66 67  1  0      
 67 68  2  0      
 68 69  1  0      
 69 70  2  0      
 70 58  1  0      
 56 71  2  0      
 71 72  1  0      
 72 73  2  0      
 73 74  1  0      
 74 75  2  0      
 75 56  1  0      
 76 77  1  0      
 77 78  2  0      
 77 79  1  0      
 79 80  2  0      
 80 81  1  0      
 81 82  2  0      
 82 83  1  0      
 83 84  2  0      
 84 79  1  0      
 82 85  1  0      
 83 86  1  0      
 81 87  1  0      
 86 88  1  0      
 88 89  1  0      
 85 90  1  0      
 90 91  1  0      
 87 92  1  0      
 92 93  1  0      
 93 94  2  0      
 94 95  1  0      
 95 96  2  0      
 96 97  1  0      
 97 98  2  0      
 98 93  1  0      
 91 99  2  0      
 99100  1  0      
100101  2  0      
101102  1  0      
102103  2  0      
103 91  1  0      
 89104  2  0      
104105  1  0      
105106  2  0      
106107  1  0      
107108  2  0      
108 89  1  0      
115116  2  0      
116117  1  0      
117118  2  0      
118119  1  0      
119120  2  0      
120115  1  0      
117109  1  0      
118110  1  0      
120121  1  0      
115123  1  0      
123124  2  0      
124125  1  0      
125126  2  0      
126127  1  0      
127128  2  0      
128123  1  0      
127111  1  0      
126112  1  0      
124122  1  0      
122113  2  0      
121114  2  0      
116129  1  0      
128130  1  0      
111131  1  0      
131132  1  0      
130133  1  0      
133134  1  0      
129135  1  0      
109136  1  0      
136137  1  0      
132138  2  0      
138139  1  0      
139140  2  0      
140141  1  0      
141142  2  0      
142132  1  0      
134143  2  0      
143144  1  0      
144145  2  0      
145146  1  0      
146147  2  0      
147134  1  0      
137148  2  0      
148149  1  0      
149150  2  0      
150151  1  0      
151152  2  0      
152137  1  0      
135153  1  0      
153154  2  0      
154155  1  0      
155156  2  0      
156157  1  0      
157158  2  0      
158153  1  0      
112159  1  0      
159160  1  0      
110161  1  0      
161162  1  0      
160163  1  0      
162164  1  0      
  8122  1  0      
  9121  1  0      
M  END
