# Supplementary material for: A unified strategy for the synthesis of highly oxygenated diaryl ethers featured in ellagitannins
Source: Springer Nature journal article supplement (doi:10.1038/ncomms4478), 2014-03-24
Supplement: 41467_2014_BFncomms4478_MOESM49_ESM.mol [file 41467_2014_BFncomms4478_MOESM49_ESM.mol]

  ChemDraw03101407342D

198222  0  0  0  0  0  0  0  0999 V2000
   -0.7330   -0.4335    0.0000 C   0  0  0  0  0  0  0  0  0  0  0  0
   -0.7330   -1.2585    0.0000 C   0  0  0  0  0  0  0  0  0  0  0  0
   -0.0186   -1.6710    0.0000 C   0  0  0  0  0  0  0  0  0  0  0  0
    0.6959   -1.2585    0.0000 C   0  0  0  0  0  0  0  0  0  0  0  0
    0.6959   -0.4335    0.0000 O   0  0  0  0  0  0  0  0  0  0  0  0
   -0.0186   -0.0210    0.0000 C   0  0  0  0  0  0  0  0  0  0  0  0
   -0.0186    0.8011    0.0000 C   0  0  0  0  0  0  0  0  0  0  0  0
   -0.7306    1.2122    0.0000 O   0  0  0  0  0  0  0  0  0  0  0  0
   -1.4450   -0.0224    0.0000 O   0  0  0  0  0  0  0  0  0  0  0  0
   -1.4450   -1.6696    0.0000 O   0  0  0  0  0  0  0  0  0  0  0  0
   -2.2414   -1.8833    0.0000 C   0  0  0  0  0  0  0  0  0  0  0  0
   -2.8258   -1.2983    0.0000 O   0  0  0  0  0  0  0  0  0  0  0  0
   -2.4545   -2.6791    0.0000 C   0  0  0  0  0  0  0  0  0  0  0  0
   -3.2532   -2.8928    0.0000 C   0  0  0  0  0  0  0  0  0  0  0  0
   -3.4663   -3.6885    0.0000 C   0  0  0  0  0  0  0  0  0  0  0  0
   -2.8819   -4.2735    0.0000 C   0  0  0  0  0  0  0  0  0  0  0  0
   -2.0861   -4.0598    0.0000 C   0  0  0  0  0  0  0  0  0  0  0  0
   -1.8724   -3.2611    0.0000 C   0  0  0  0  0  0  0  0  0  0  0  0
   -3.0950   -5.0693    0.0000 O   0  0  0  0  0  0  0  0  0  0  0  0
   -4.2626   -3.9022    0.0000 O   0  0  0  0  0  0  0  0  0  0  0  0
   -1.5012   -4.6419    0.0000 O   0  0  0  0  0  0  0  0  0  0  0  0
   -1.7149   -5.4405    0.0000 C   0  0  0  0  0  0  0  0  0  0  0  0
   -4.4758   -4.7003    0.0000 C   0  0  0  0  0  0  0  0  0  0  0  0
   -3.8937   -5.2853    0.0000 C   0  0  0  0  0  0  0  0  0  0  0  0
   -4.1045   -6.0810    0.0000 C   0  0  0  0  0  0  0  0  0  0  0  0
   -5.2744   -4.9140    0.0000 C   0  0  0  0  0  0  0  0  0  0  0  0
   -1.3024   -6.1538    0.0000 C   0  0  0  0  0  0  0  0  0  0  0  0
   -5.8565   -4.3291    0.0000 C   0  0  0  0  0  0  0  0  0  0  0  0
   -6.6523   -4.5450    0.0000 C   0  0  0  0  0  0  0  0  0  0  0  0
   -6.8660   -5.3408    0.0000 C   0  0  0  0  0  0  0  0  0  0  0  0
   -6.2839   -5.9235    0.0000 C   0  0  0  0  0  0  0  0  0  0  0  0
   -5.4875   -5.7098    0.0000 C   0  0  0  0  0  0  0  0  0  0  0  0
   -4.9032   -6.2947    0.0000 C   0  0  0  0  0  0  0  0  0  0  0  0
   -5.1163   -7.0905    0.0000 C   0  0  0  0  0  0  0  0  0  0  0  0
   -4.5342   -7.6749    0.0000 C   0  0  0  0  0  0  0  0  0  0  0  0
   -3.7361   -7.4618    0.0000 C   0  0  0  0  0  0  0  0  0  0  0  0
   -3.5224   -6.6631    0.0000 C   0  0  0  0  0  0  0  0  0  0  0  0
   -1.7149   -6.8694    0.0000 C   0  0  0  0  0  0  0  0  0  0  0  0
   -1.3024   -7.5832    0.0000 C   0  0  0  0  0  0  0  0  0  0  0  0
   -0.4774   -7.5832    0.0000 C   0  0  0  0  0  0  0  0  0  0  0  0
   -0.0649   -6.8694    0.0000 C   0  0  0  0  0  0  0  0  0  0  0  0
   -0.4774   -6.1538    0.0000 C   0  0  0  0  0  0  0  0  0  0  0  0
   -0.0186   -2.4931    0.0000 O   0  0  0  0  0  0  0  0  0  0  0  0
   -0.2323   -3.2918    0.0000 C   0  0  0  0  0  0  0  0  0  0  0  0
    0.3527   -3.8739    0.0000 C   0  0  0  0  0  0  0  0  0  0  0  0
   -1.0281   -3.5049    0.0000 O   0  0  0  0  0  0  0  0  0  0  0  0
    0.1390   -4.6725    0.0000 C   0  0  0  0  0  0  0  0  0  0  0  0
    0.7216   -5.2546    0.0000 C   0  0  0  0  0  0  0  0  0  0  0  0
    1.5174   -5.0409    0.0000 C   0  0  0  0  0  0  0  0  0  0  0  0
    1.7311   -4.2451    0.0000 C   0  0  0  0  0  0  0  0  0  0  0  0
    1.1485   -3.6602    0.0000 C   0  0  0  0  0  0  0  0  0  0  0  0
    2.1024   -5.6236    0.0000 O   0  0  0  0  0  0  0  0  0  0  0  0
    0.5079   -6.0504    0.0000 O   0  0  0  0  0  0  0  0  0  0  0  0
    2.5292   -4.0314    0.0000 O   0  0  0  0  0  0  0  0  0  0  0  0
    1.0929   -6.6353    0.0000 C   0  0  0  0  0  0  0  0  0  0  0  0
    0.8769   -7.4311    0.0000 C   0  0  0  0  0  0  0  0  0  0  0  0
    1.8887   -6.4216    0.0000 C   0  0  0  0  0  0  0  0  0  0  0  0
    2.4707   -7.0043    0.0000 C   0  0  0  0  0  0  0  0  0  0  0  0
    3.1118   -4.6141    0.0000 C   0  0  0  0  0  0  0  0  0  0  0  0
    3.9099   -4.4004    0.0000 C   0  0  0  0  0  0  0  0  0  0  0  0
    4.4920   -4.9830    0.0000 C   0  0  0  0  0  0  0  0  0  0  0  0
    5.2906   -4.7716    0.0000 C   0  0  0  0  0  0  0  0  0  0  0  0
    5.5015   -3.9736    0.0000 C   0  0  0  0  0  0  0  0  0  0  0  0
    4.9194   -3.3909    0.0000 C   0  0  0  0  0  0  0  0  0  0  0  0
    4.1236   -3.6046    0.0000 C   0  0  0  0  0  0  0  0  0  0  0  0
    2.2576   -7.8024    0.0000 C   0  0  0  0  0  0  0  0  0  0  0  0
    2.8420   -8.3850    0.0000 C   0  0  0  0  0  0  0  0  0  0  0  0
    3.6383   -8.1713    0.0000 C   0  0  0  0  0  0  0  0  0  0  0  0
    3.8515   -7.3755    0.0000 C   0  0  0  0  0  0  0  0  0  0  0  0
    3.2694   -6.7906    0.0000 C   0  0  0  0  0  0  0  0  0  0  0  0
    0.0811   -7.6448    0.0000 C   0  0  0  0  0  0  0  0  0  0  0  0
   -0.1326   -8.4429    0.0000 C   0  0  0  0  0  0  0  0  0  0  0  0
    0.4495   -9.0255    0.0000 C   0  0  0  0  0  0  0  0  0  0  0  0
    1.2481   -8.8118    0.0000 C   0  0  0  0  0  0  0  0  0  0  0  0
    1.4618   -8.0161    0.0000 C   0  0  0  0  0  0  0  0  0  0  0  0
    1.4079   -1.6696    0.0000 O   0  0  0  0  0  0  0  0  0  0  0  0
    2.1235   -2.0821    0.0000 C   0  0  0  0  0  0  0  0  0  0  0  0
    2.1235   -2.9071    0.0000 O   0  0  0  0  0  0  0  0  0  0  0  0
    2.8373   -1.6696    0.0000 C   0  0  0  0  0  0  0  0  0  0  0  0
    3.5529   -2.0821    0.0000 C   0  0  0  0  0  0  0  0  0  0  0  0
    4.2662   -1.6696    0.0000 C   0  0  0  0  0  0  0  0  0  0  0  0
    4.2662   -0.8446    0.0000 C   0  0  0  0  0  0  0  0  0  0  0  0
    3.5529   -0.4321    0.0000 C   0  0  0  0  0  0  0  0  0  0  0  0
    2.8373   -0.8446    0.0000 C   0  0  0  0  0  0  0  0  0  0  0  0
    4.9823   -0.4321    0.0000 O   0  0  0  0  0  0  0  0  0  0  0  0
    3.5529    0.3929    0.0000 O   0  0  0  0  0  0  0  0  0  0  0  0
    4.9823   -2.0821    0.0000 O   0  0  0  0  0  0  0  0  0  0  0  0
    4.2662    0.8054    0.0000 C   0  0  0  0  0  0  0  0  0  0  0  0
    4.2662    1.6304    0.0000 C   0  0  0  0  0  0  0  0  0  0  0  0
    5.6956   -0.8446    0.0000 C   0  0  0  0  0  0  0  0  0  0  0  0
    6.4089   -0.4321    0.0000 C   0  0  0  0  0  0  0  0  0  0  0  0
    5.6956   -1.6696    0.0000 C   0  0  0  0  0  0  0  0  0  0  0  0
    6.4089   -2.0821    0.0000 C   0  0  0  0  0  0  0  0  0  0  0  0
    6.4089   -2.9071    0.0000 C   0  0  0  0  0  0  0  0  0  0  0  0
    7.1244   -3.3196    0.0000 C   0  0  0  0  0  0  0  0  0  0  0  0
    7.8383   -2.9071    0.0000 C   0  0  0  0  0  0  0  0  0  0  0  0
    7.8383   -2.0821    0.0000 C   0  0  0  0  0  0  0  0  0  0  0  0
    7.1244   -1.6696    0.0000 C   0  0  0  0  0  0  0  0  0  0  0  0
    7.1244   -0.8446    0.0000 C   0  0  0  0  0  0  0  0  0  0  0  0
    7.8383   -0.4321    0.0000 C   0  0  0  0  0  0  0  0  0  0  0  0
    7.8383    0.3929    0.0000 C   0  0  0  0  0  0  0  0  0  0  0  0
    7.1244    0.8054    0.0000 C   0  0  0  0  0  0  0  0  0  0  0  0
    6.4089    0.3929    0.0000 C   0  0  0  0  0  0  0  0  0  0  0  0
    4.9823    2.0429    0.0000 C   0  0  0  0  0  0  0  0  0  0  0  0
    4.9823    2.8679    0.0000 C   0  0  0  0  0  0  0  0  0  0  0  0
    4.2662    3.2804    0.0000 C   0  0  0  0  0  0  0  0  0  0  0  0
    3.5529    2.8679    0.0000 C   0  0  0  0  0  0  0  0  0  0  0  0
    3.5529    2.0429    0.0000 C   0  0  0  0  0  0  0  0  0  0  0  0
   -4.9799    2.5743    0.0000 O   0  0  0  0  0  0  0  0  0  0  0  0
   -4.9799    0.9272    0.0000 O   0  0  0  0  0  0  0  0  0  0  0  0
   -1.4130    4.6345    0.0000 O   0  0  0  0  0  0  0  0  0  0  0  0
    0.0136    3.8095    0.0000 O   0  0  0  0  0  0  0  0  0  0  0  0
   -1.9761    1.4703    0.0000 O   0  0  0  0  0  0  0  0  0  0  0  0
   -1.5006    1.1552    0.0000 O   0  0  0  0  0  0  0  0  0  0  0  0
   -2.8372    2.1647    0.0000 C   0  0  0  0  0  0  0  0  0  0  0  0
   -3.5534    2.5772    0.0000 C   0  0  0  0  0  0  0  0  0  0  0  0
   -4.2667    2.1647    0.0000 C   0  0  0  0  0  0  0  0  0  0  0  0
   -4.2667    1.3397    0.0000 C   0  0  0  0  0  0  0  0  0  0  0  0
   -3.5534    0.9272    0.0000 C   0  0  0  0  0  0  0  0  0  0  0  0
   -2.8372    1.3397    0.0000 C   0  0  0  0  0  0  0  0  0  0  0  0
   -2.0563    0.8688    0.0000 C   0  0  0  0  0  0  0  0  0  0  0  0
   -1.4152    1.7396    0.0000 C   0  0  0  0  0  0  0  0  0  0  0  0
   -2.1262    2.5743    0.0000 C   0  0  0  0  0  0  0  0  0  0  0  0
   -1.4130    2.1618    0.0000 C   0  0  0  0  0  0  0  0  0  0  0  0
   -0.6974    2.5743    0.0000 C   0  0  0  0  0  0  0  0  0  0  0  0
   -0.6974    3.3993    0.0000 C   0  0  0  0  0  0  0  0  0  0  0  0
   -1.4130    3.8118    0.0000 C   0  0  0  0  0  0  0  0  0  0  0  0
   -2.1262    3.3993    0.0000 C   0  0  0  0  0  0  0  0  0  0  0  0
   -3.5534    3.4022    0.0000 O   0  0  0  0  0  0  0  0  0  0  0  0
   -2.8401    3.8118    0.0000 O   0  0  0  0  0  0  0  0  0  0  0  0
   -1.9956    5.2172    0.0000 C   0  0  0  0  0  0  0  0  0  0  0  0
   -1.5831    5.9328    0.0000 C   0  0  0  0  0  0  0  0  0  0  0  0
   -2.6264    4.6082    0.0000 C   0  0  0  0  0  0  0  0  0  0  0  0
   -3.0389    5.3238    0.0000 C   0  0  0  0  0  0  0  0  0  0  0  0
   -4.3492    3.6153    0.0000 C   0  0  0  0  0  0  0  0  0  0  0  0
   -5.6932    2.1618    0.0000 C   0  0  0  0  0  0  0  0  0  0  0  0
   -6.4094    2.5743    0.0000 C   0  0  0  0  0  0  0  0  0  0  0  0
   -0.7581    5.9328    0.0000 C   0  0  0  0  0  0  0  0  0  0  0  0
   -0.3456    6.6461    0.0000 C   0  0  0  0  0  0  0  0  0  0  0  0
   -0.7581    7.3622    0.0000 C   0  0  0  0  0  0  0  0  0  0  0  0
   -1.5831    7.3622    0.0000 C   0  0  0  0  0  0  0  0  0  0  0  0
   -1.9956    6.6461    0.0000 C   0  0  0  0  0  0  0  0  0  0  0  0
   -2.6264    6.0370    0.0000 C   0  0  0  0  0  0  0  0  0  0  0  0
   -3.0389    6.7532    0.0000 C   0  0  0  0  0  0  0  0  0  0  0  0
   -3.8639    6.7532    0.0000 C   0  0  0  0  0  0  0  0  0  0  0  0
   -4.2764    6.0370    0.0000 C   0  0  0  0  0  0  0  0  0  0  0  0
   -3.8639    5.3238    0.0000 C   0  0  0  0  0  0  0  0  0  0  0  0
   -6.4094    3.3993    0.0000 C   0  0  0  0  0  0  0  0  0  0  0  0
   -7.1226    3.8118    0.0000 C   0  0  0  0  0  0  0  0  0  0  0  0
   -7.8359    3.3993    0.0000 C   0  0  0  0  0  0  0  0  0  0  0  0
   -7.8359    2.5743    0.0000 C   0  0  0  0  0  0  0  0  0  0  0  0
   -7.1226    2.1618    0.0000 C   0  0  0  0  0  0  0  0  0  0  0  0
   -4.7617    4.3286    0.0000 C   0  0  0  0  0  0  0  0  0  0  0  0
   -4.3492    5.0448    0.0000 C   0  0  0  0  0  0  0  0  0  0  0  0
   -4.7617    5.7580    0.0000 C   0  0  0  0  0  0  0  0  0  0  0  0
   -5.5867    5.7580    0.0000 C   0  0  0  0  0  0  0  0  0  0  0  0
   -5.9992    5.0448    0.0000 C   0  0  0  0  0  0  0  0  0  0  0  0
   -5.5867    4.3286    0.0000 C   0  0  0  0  0  0  0  0  0  0  0  0
   -5.6932    1.3397    0.0000 C   0  0  0  0  0  0  0  0  0  0  0  0
   -6.4094    0.9272    0.0000 C   0  0  0  0  0  0  0  0  0  0  0  0
   -7.1230    1.3411    0.0000 C   0  0  0  0  0  0  0  0  0  0  0  0
   -7.8383    0.9272    0.0000 C   0  0  0  0  0  0  0  0  0  0  0  0
   -7.8383    0.1022    0.0000 C   0  0  0  0  0  0  0  0  0  0  0  0
   -7.1230   -0.3117    0.0000 C   0  0  0  0  0  0  0  0  0  0  0  0
   -6.4094    0.1022    0.0000 C   0  0  0  0  0  0  0  0  0  0  0  0
    0.7281    4.2220    0.0000 C   0  0  0  0  0  0  0  0  0  0  0  0
    1.4425    3.8095    0.0000 C   0  0  0  0  0  0  0  0  0  0  0  0
    2.1570    4.2220    0.0000 C   0  0  0  0  0  0  0  0  0  0  0  0
    2.1570    5.0470    0.0000 C   0  0  0  0  0  0  0  0  0  0  0  0
    1.4425    5.4595    0.0000 C   0  0  0  0  0  0  0  0  0  0  0  0
    0.7281    5.0470    0.0000 C   0  0  0  0  0  0  0  0  0  0  0  0
    0.0161    5.4581    0.0000 O   0  0  0  0  0  0  0  0  0  0  0  0
    1.4425    2.9874    0.0000 C   0  0  0  0  0  0  0  0  0  0  0  0
    2.1545    2.5763    0.0000 O   0  0  0  0  0  0  0  0  0  0  0  0
    2.8690    5.4581    0.0000 O   0  0  0  0  0  0  0  0  0  0  0  0
    1.4425    6.2817    0.0000 O   0  0  0  0  0  0  0  0  0  0  0  0
    1.6429    7.0790    0.0000 C   0  0  0  0  0  0  0  0  0  0  0  0
    1.0526    7.6512    0.0000 C   0  0  0  0  0  0  0  0  0  0  0  0
    3.5580    5.9066    0.0000 C   0  0  0  0  0  0  0  0  0  0  0  0
    4.2910    5.5342    0.0000 C   0  0  0  0  0  0  0  0  0  0  0  0
    1.2537    8.4513    0.0000 C   0  0  0  0  0  0  0  0  0  0  0  0
    0.6613    9.0255    0.0000 C   0  0  0  0  0  0  0  0  0  0  0  0
   -0.1322    8.7996    0.0000 C   0  0  0  0  0  0  0  0  0  0  0  0
   -0.3333    7.9995    0.0000 C   0  0  0  0  0  0  0  0  0  0  0  0
    0.2591    7.4253    0.0000 C   0  0  0  0  0  0  0  0  0  0  0  0
    4.3350    4.7104    0.0000 C   0  0  0  0  0  0  0  0  0  0  0  0
    5.0705    4.3366    0.0000 C   0  0  0  0  0  0  0  0  0  0  0  0
    5.7619    4.7867    0.0000 C   0  0  0  0  0  0  0  0  0  0  0  0
    5.7179    5.6105    0.0000 C   0  0  0  0  0  0  0  0  0  0  0  0
    4.9824    5.9843    0.0000 C   0  0  0  0  0  0  0  0  0  0  0  0
    2.0259    6.0429    0.0000 O   0  0  0  0  0  0  0  0  0  0  0  0
    2.8228    6.2564    0.0000 C   0  0  0  0  0  0  0  0  0  0  0  0
    3.4062    6.8398    0.0000 C   0  0  0  0  0  0  0  0  0  0  0  0
    4.2031    6.6263    0.0000 C   0  0  0  0  0  0  0  0  0  0  0  0
    4.7864    7.2096    0.0000 C   0  0  0  0  0  0  0  0  0  0  0  0
    4.5729    8.0065    0.0000 C   0  0  0  0  0  0  0  0  0  0  0  0
    3.7760    8.2200    0.0000 C   0  0  0  0  0  0  0  0  0  0  0  0
    3.1926    7.6367    0.0000 C   0  0  0  0  0  0  0  0  0  0  0  0
  1  2  1  0      
  2  3  1  0      
  3  4  1  0      
  4  5  1  0      
  5  6  1  0      
  6  1  1  0      
  3 43  1  6      
  4 76  1  1      
  6  7  1  1      
  7  8  1  0      
  1  9  1  6      
  2 10  1  1      
 10 11  1  0      
 11 12  2  0      
 11 13  1  0      
 13 14  2  0      
 14 15  1  0      
 15 16  2  0      
 16 17  1  0      
 17 18  2  0      
 18 13  1  0      
 16 19  1  0      
 15 20  1  0      
 17 21  1  0      
 21 22  1  0      
 20 23  1  0      
 19 24  1  0      
 24 25  1  0      
 23 26  1  0      
 22 27  1  0      
 26 28  2  0      
 28 29  1  0      
 29 30  2  0      
 30 31  1  0      
 31 32  2  0      
 32 26  1  0      
 25 33  2  0      
 33 34  1  0      
 34 35  2  0      
 35 36  1  0      
 36 37  2  0      
 37 25  1  0      
 27 38  2  0      
 38 39  1  0      
 39 40  2  0      
 40 41  1  0      
 41 42  2  0      
 42 27  1  0      
 43 44  1  0      
 44 45  1  0      
 44 46  2  0      
 45 47  2  0      
 47 48  1  0      
 48 49  2  0      
 49 50  1  0      
 50 51  2  0      
 51 45  1  0      
 49 52  1  0      
 48 53  1  0      
 50 54  1  0      
 53 55  1  0      
 55 56  1  0      
 52 57  1  0      
 57 58  1  0      
 54 59  1  0      
 59 60  1  0      
 60 61  2  0      
 61 62  1  0      
 62 63  2  0      
 63 64  1  0      
 64 65  2  0      
 65 60  1  0      
 58 66  2  0      
 66 67  1  0      
 67 68  2  0      
 68 69  1  0      
 69 70  2  0      
 70 58  1  0      
 56 71  2  0      
 71 72  1  0      
 72 73  2  0      
 73 74  1  0      
 74 75  2  0      
 75 56  1  0      
 76 77  1  0      
 77 78  2  0      
 77 79  1  0      
 79 80  2  0      
 80 81  1  0      
 81 82  2  0      
 82 83  1  0      
 83 84  2  0      
 84 79  1  0      
 82 85  1  0      
 83 86  1  0      
 81 87  1  0      
 86 88  1  0      
 88 89  1  0      
 85 90  1  0      
 90 91  1  0      
 87 92  1  0      
 92 93  1  0      
 93 94  2  0      
 94 95  1  0      
 95 96  2  0      
 96 97  1  0      
 97 98  2  0      
 98 93  1  0      
 91 99  2  0      
 99100  1  0      
100101  2  0      
101102  1  0      
102103  2  0      
103 91  1  0      
 89104  2  0      
104105  1  0      
105106  2  0      
106107  1  0      
107108  2  0      
108 89  1  0      
115116  2  0      
116117  1  0      
117118  2  0      
118119  1  0      
119120  2  0      
120115  1  0      
117109  1  0      
118110  1  0      
120121  1  0      
115123  1  0      
123124  2  0      
124125  1  0      
125126  2  0      
126127  1  0      
127128  2  0      
128123  1  0      
127111  1  0      
126112  1  0      
124122  1  0      
122113  2  0      
121114  2  0      
116129  1  0      
128130  1  0      
111131  1  0      
131132  1  0      
130133  1  0      
133134  1  0      
129135  1  0      
109136  1  0      
136137  1  0      
132138  2  0      
138139  1  0      
139140  2  0      
140141  1  0      
141142  2  0      
142132  1  0      
134143  2  0      
143144  1  0      
144145  2  0      
145146  1  0      
146147  2  0      
147134  1  0      
137148  2  0      
148149  1  0      
149150  2  0      
150151  1  0      
151152  2  0      
152137  1  0      
135153  1  0      
153154  2  0      
154155  1  0      
155156  2  0      
156157  1  0      
157158  2  0      
158153  1  0      
110159  1  0      
159160  1  0      
  8122  1  0      
  9121  1  0      
160161  2  0      
161162  1  0      
162163  2  0      
163164  1  0      
164165  2  0      
165160  1  0      
112166  1  0      
166167  2  0      
167168  1  0      
168169  2  0      
169170  1  0      
170171  1  0      
171166  1  0      
171172  2  0      
167173  1  0      
173174  2  0      
169175  1  0      
170176  1  0      
176177  1  0      
177178  1  0      
175179  1  0      
179180  1  0      
178181  2  0      
181182  1  0      
182183  2  0      
183184  1  0      
184185  2  0      
185178  1  0      
180186  2  0      
186187  1  0      
187188  2  0      
188189  1  0      
189190  2  0      
190180  1  0      
170191  1  0      
191192  1  0      
192193  1  0      
193194  2  0      
194195  1  0      
195196  2  0      
196197  1  0      
197198  2  0      
198193  1  0      
M  END
